# Supplementary material for: Theoretical prediction of superconductivity in two-dimensional MXenes of molybdenum carbides
Source: Royal Society of Chemistry journal article supplement (doi:10.1039/d2cp04306h), 2022-11-29
Supplement: d2cp04306h1.pdf [file d2cp04306h1.pdf]

## **SUPPLEMENTARY MATERIALS**

### **Theoretical prediction of superconductivity in two-dimensional MXenes of molybdenum carbides**

Hao-Dong Liu,<sup>1</sup> Hong-Yan Lu,<sup>1</sup> Na Jiao,<sup>1</sup> Mengmeng Zheng,<sup>1</sup>  
Ya-Ping Li,<sup>1</sup> Liu Yang,<sup>1</sup> Bao-Tian Wang,<sup>2,3,4,\*</sup> and Ping Zhang<sup>1,5,†</sup>

<sup>1</sup>*School of Physics and Physical Engineering, Qufu Normal University, Qufu 273165, China*

<sup>2</sup>*Institute of High Energy Physics, Chinese Academy of Sciences, Beijing 100049, China*

<sup>3</sup>*Spallation Neutron Source Science Center, Dongguan 523803, China*

<sup>4</sup>*Collaborative Innovation Center of Extreme Optics, Shanxi University, Taiyuan, Shanxi 030006, China*

<sup>5</sup>*Institute of Applied Physics and Computational Mathematics, Beijing 100088, China*

The structures and energy comparison of  $\text{Mo}_3\text{C}_2$  and  $\text{Mo}_3\text{C}_3$  systems with different configurations are shown in Figs. S1 and S2, respectively. As we can see, the most stable configurations of  $\text{Mo}_3\text{C}_2$  and  $\text{Mo}_3\text{C}_3$  are both 'H-1', which can be seen as the 'AA' stacking of H- $\text{Mo}_2\text{C}$ .

In addition, we also investigate the effects of biaxial stretching on the superconducting related physical quantities of four

our studied 2D  $\text{Mo}_x\text{C}_y$ , which can be seen in Fig. S3.

As shown in Fig. S4, we explore the biaxial stretching limit of T- $\text{Mo}_2\text{C}$ , H- $\text{Mo}_2\text{C}$ , H- $\text{Mo}_3\text{C}_2$ , and H- $\text{Mo}_3\text{C}_3$ . Herein, we can find that when the  $\varepsilon$  is beyond the limit of biaxial stretching, the phonon dispersions of T- $\text{Mo}_2\text{C}$ , H- $\text{Mo}_3\text{C}_2$ , and H- $\text{Mo}_3\text{C}_3$  emerge the features of CDW.

---

\* Author to whom correspondence should be addressed. E-mail: wang-bt@ihep.ac.cn

† Author to whom correspondence should be addressed. E-mail:

zhang\_ping@iapcm.ac.cn

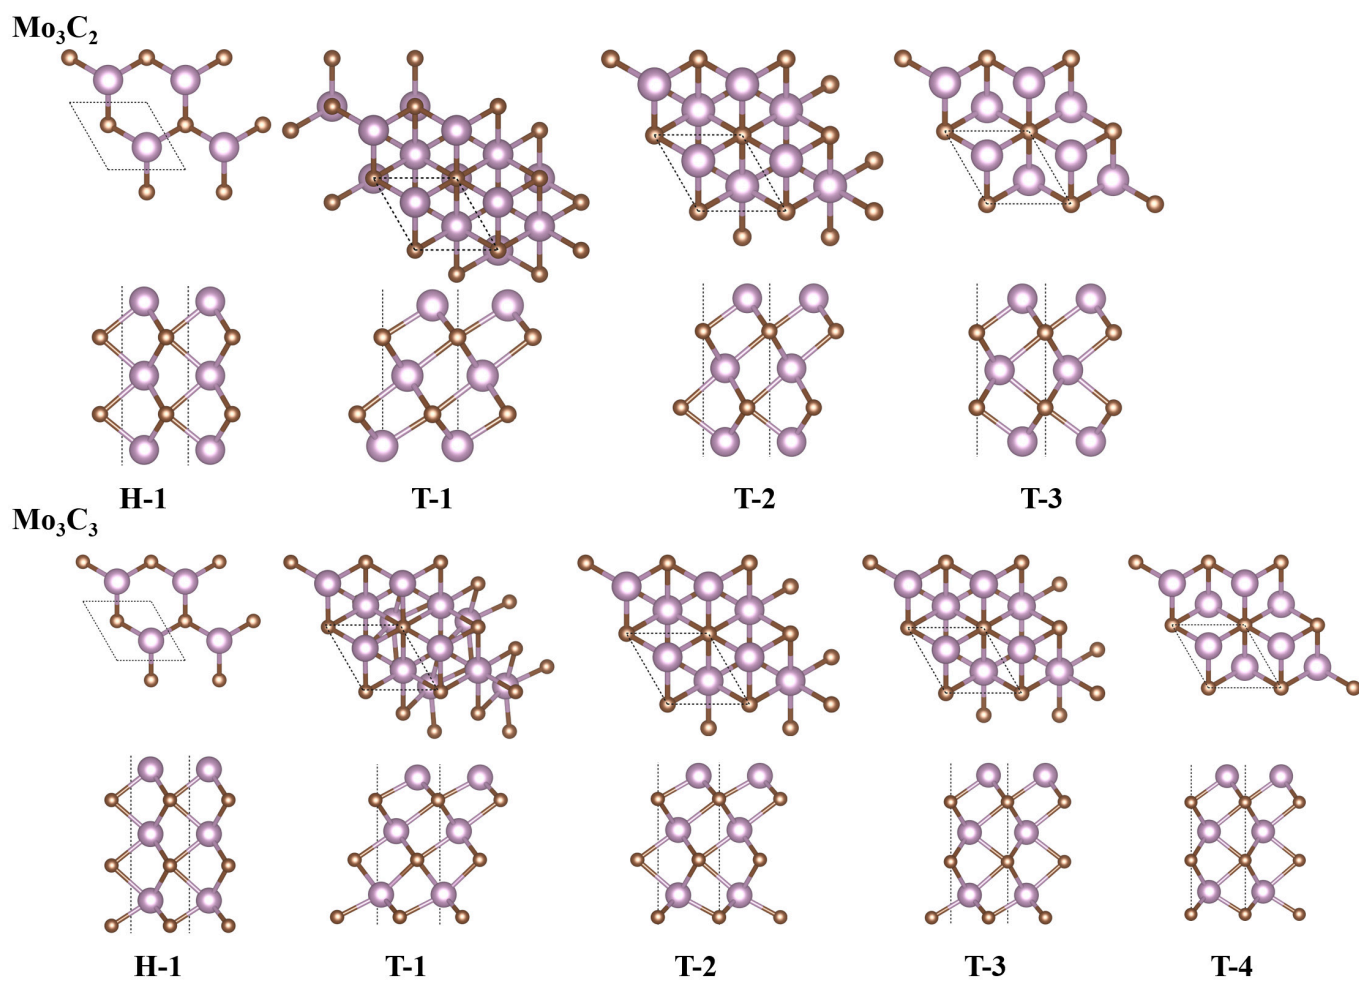

FIG. S1: The considered different structures of  $\text{Mo}_3\text{C}_2$  and  $\text{Mo}_3\text{C}_3$ .

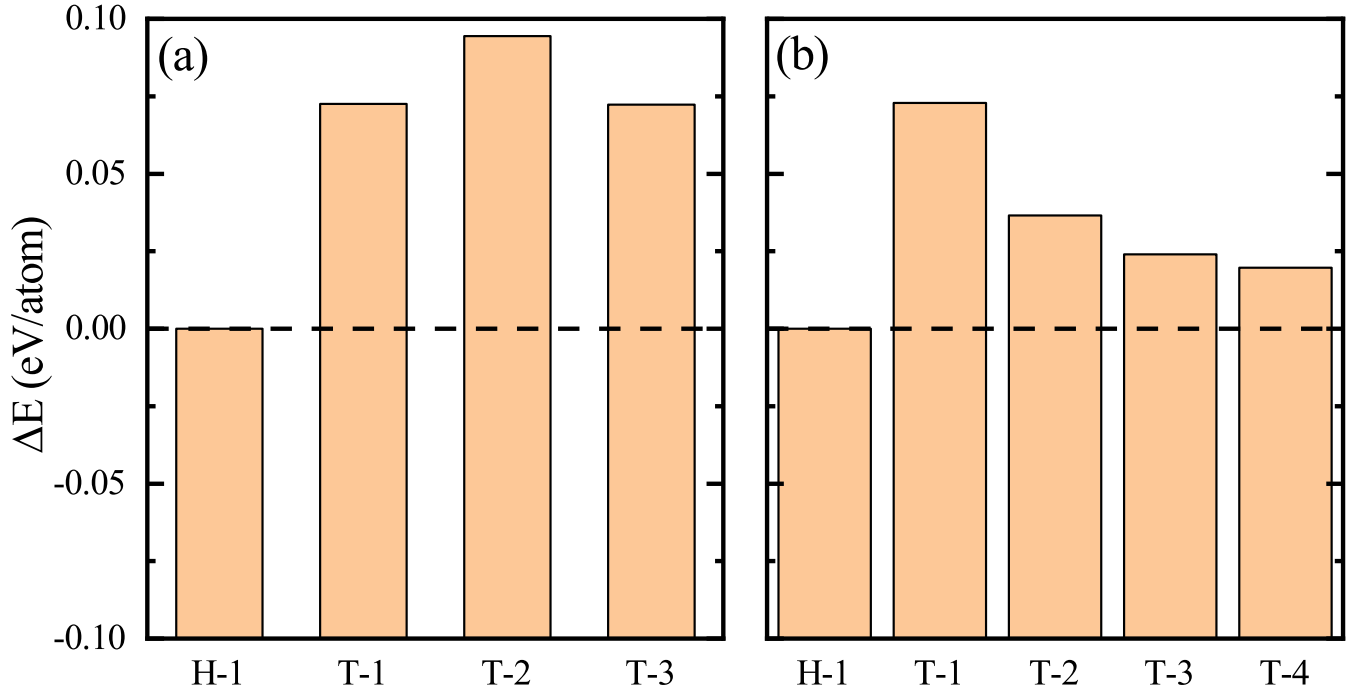

FIG. S2: Energy comparison of different configurations for (a)  $\text{Mo}_3\text{C}_2$  and (b)  $\text{Mo}_3\text{C}_3$ . The configurations with the lowest total energy in different systems are set to 0.0 eV/atom. The dash line are guided to the eye.

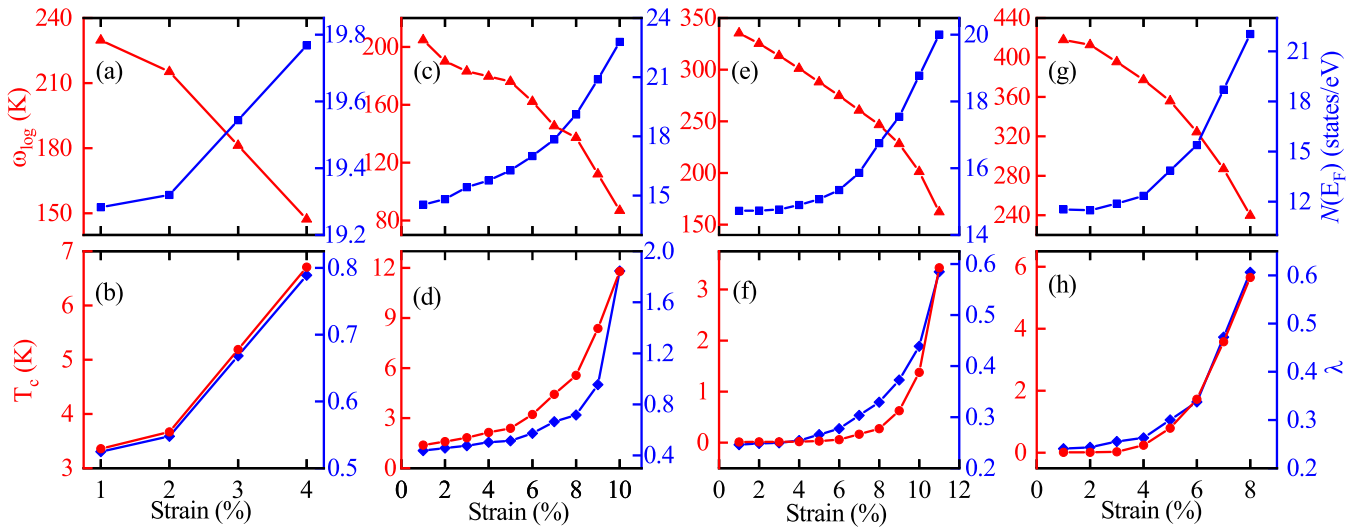

FIG. S3: The logarithmically averaged phonon frequency  $\omega_{\log}$  (red),  $N(E_F)$  (blue),  $T_c$  (red), and EPC constant  $\lambda$  (blue) under different biaxial tensile strains for (a)-(b) T- $\text{Mo}_2\text{C}$ , (c)-(d) H- $\text{Mo}_2\text{C}$ , (e)-(f) H- $\text{Mo}_3\text{C}_2$ , and (g)-(h) H- $\text{Mo}_3\text{C}_3$ .

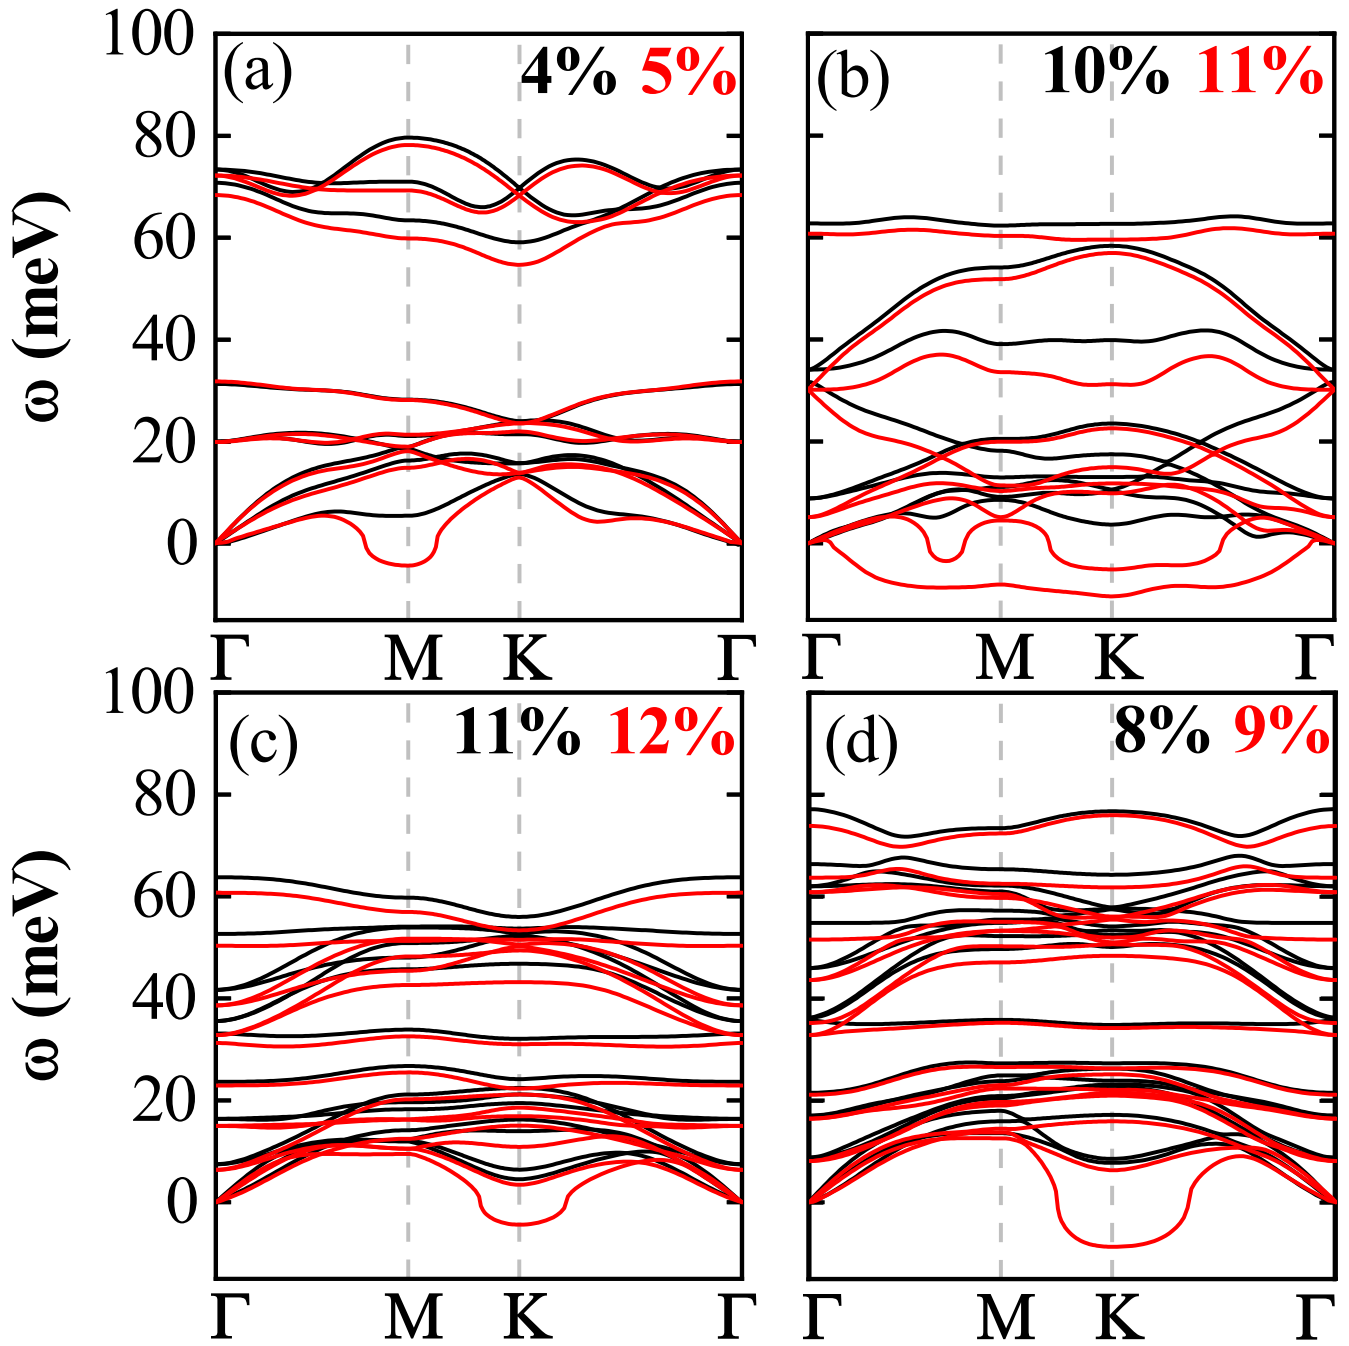

FIG. S4: The phonon spectra of (a) T-Mo<sub>2</sub>C, (b) H-Mo<sub>2</sub>C, (c) H-Mo<sub>3</sub>C<sub>2</sub>, and (d) H-Mo<sub>3</sub>C<sub>3</sub> beyond the limit of biaxial stretching.
